# Supplementary material for: Highly parallel and efficient single cell mRNA sequencing with paired picoliter chambers
Source: PubMed Central journal article supplement (PMC7193604; doi:10.1038/s41467-020-15765-0), 2020-04-30
Supplement: 41467_2020_15765_MOESM1_ESM.pdf [file 41467_2020_15765_MOESM1_ESM.pdf]

**Title:** Supplementary Data1.

**Description:** Differential gene expression of mES cells

**Title:** Supplementary Data 2.

**Description:** Differential gene expression of drug treated and untreated cells

**Title:** Supplementary Movie 1.

**Description:** Paired-seq operation on chip

**Title:** Supplementary Movie 2.

**Description:** Function of control layer

**Title:** Supplementary Movie 3.

**Description:** Paired unit isolation

**Title:** Supplementary Movie 4.

**Description:** Beads capture-1 row

**Title:** Supplementary Movie 5.

**Description:** Cell capture

**Title:** Supplementary Movie 6.

**Description:** Blocking effect

**Title:** Supplementary Movie 7.

**Description:** Mixing

**Title:** Supplementary Movie 8.

**Description:** Single cell lysis
